# Supplementary material
Source: Springer Nature journal article supplement (https://www.springermedizin.de/resource/supplementary/12913_2009_1291_MOESM2_ESM.pdf/9527786)

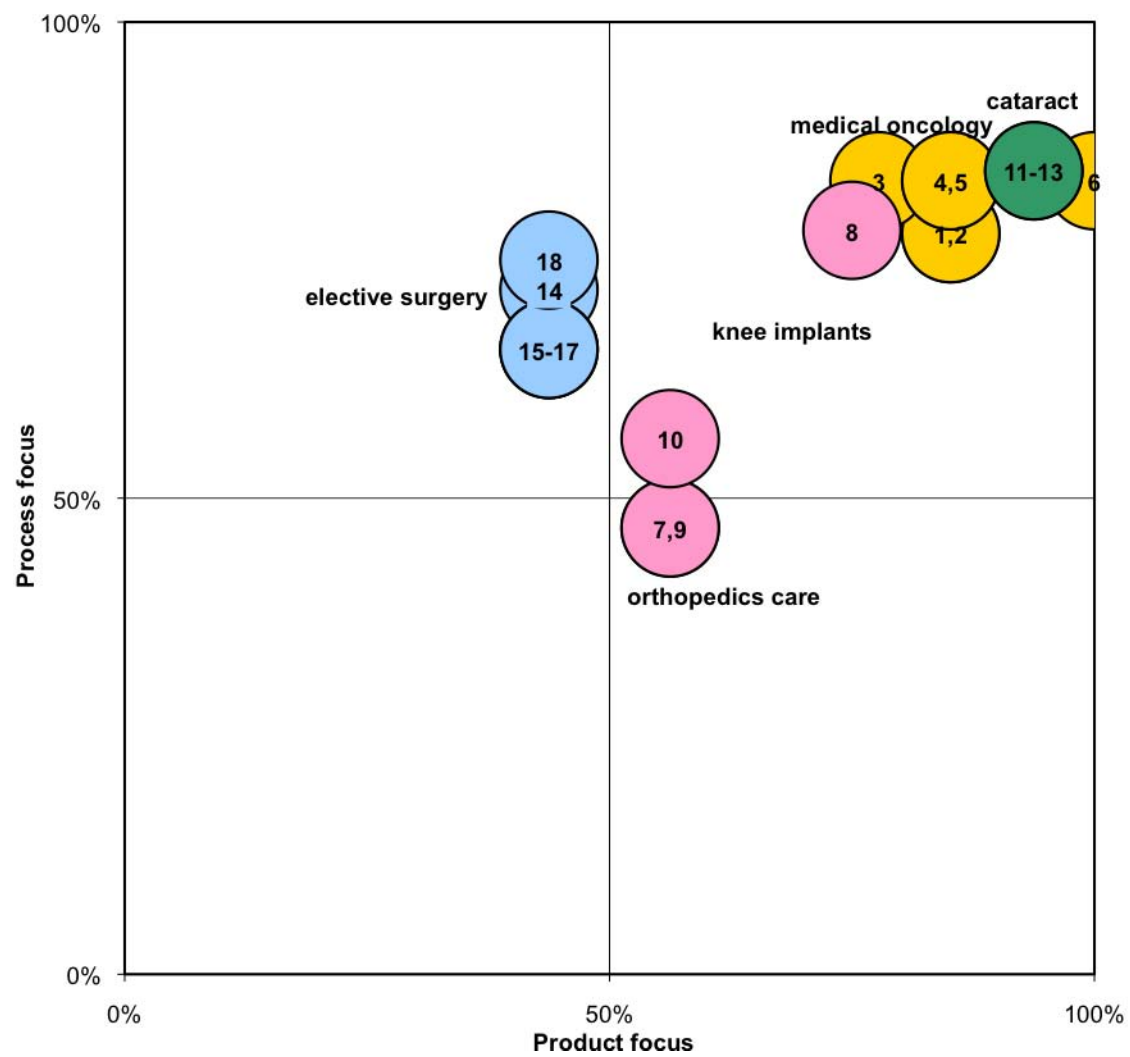

Supplement: MOESM2 [file 9527786]
